# Supplementary material for: Accurate electronic properties and non-linear optical response of two-dimensional MA2Z4
Source: Royal Society of Chemistry journal article supplement (doi:10.1039/d0nr09146d), 2021-01-01
Supplement: d0nr09146d1.pdf [file d0nr09146d1.pdf]

## Supporting Information

### Accurate Electronic Properties and Nonlinear Optical

### Response of Two-dimensional MA<sub>2</sub>Z<sub>4</sub>

Jia-Shu YANG<sup>1</sup>, Luneng Zhao<sup>1</sup>, Shi-Qi LI<sup>1\*</sup>, Hongsheng Liu<sup>1</sup>, Lu

Wang<sup>2</sup>, Maodu Chen<sup>1</sup>, Junfeng Gao<sup>1\*</sup>, Jijun Zhao<sup>1</sup>

*1. Key Laboratory of Materials Modification by Laser, Ion and Electron Beams,*

*Dalian University of Technology, Ministry of Education, Dalian 116024, China*

*2. Institute of Functional Nano & Soft Materials (FUNSOM), Jiangsu Key Laboratory*

*for Carbon-Based Functional Materials & Devices, Soochow University, Suzhou,*

*Jiangsu 215123, China*

## S1 The second-order coefficients for MA<sub>2</sub>Z<sub>4</sub> family

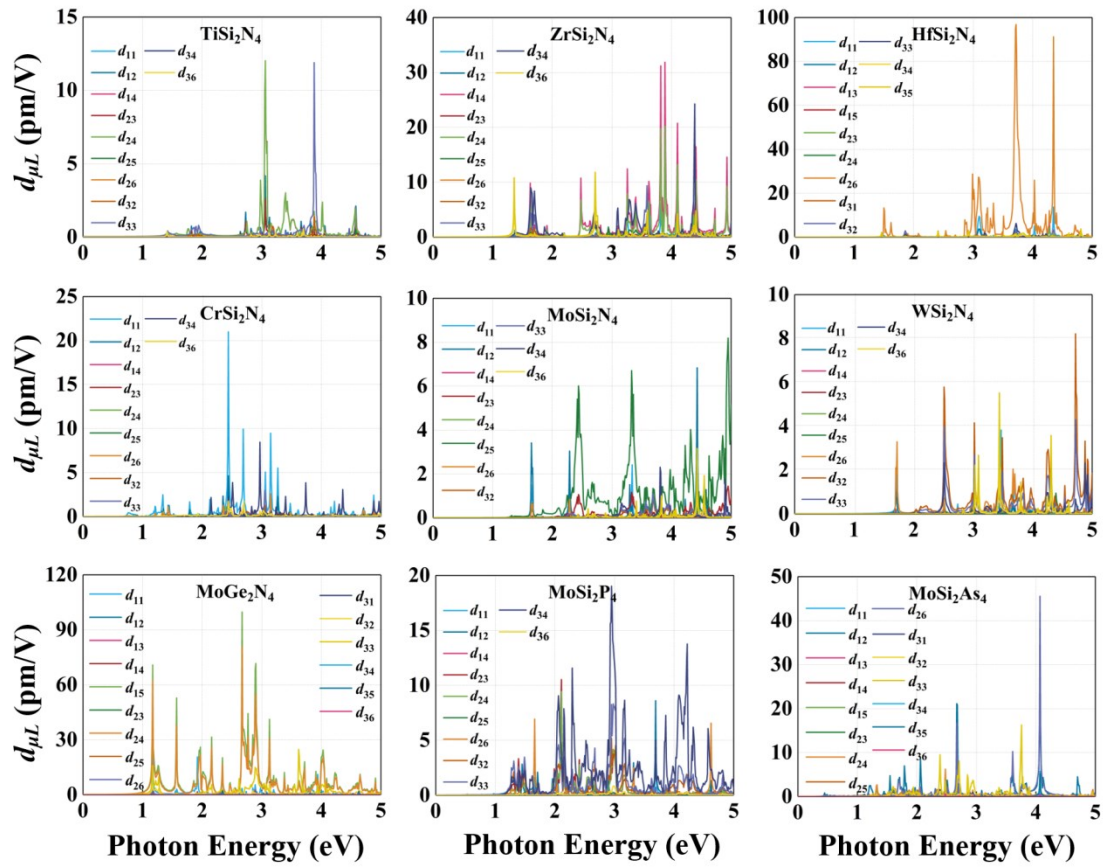

Figure S1. Besides the large  $d_{16}$ ,  $d_{21}$  and  $d_{22}$ , other small nonlinear coefficients of second-order susceptibilities of explored MA<sub>2</sub>Z<sub>4</sub>.

S2 Photon energy-dependent imaginary and real components of second-order coefficients for  $MA_2Z_4$  family

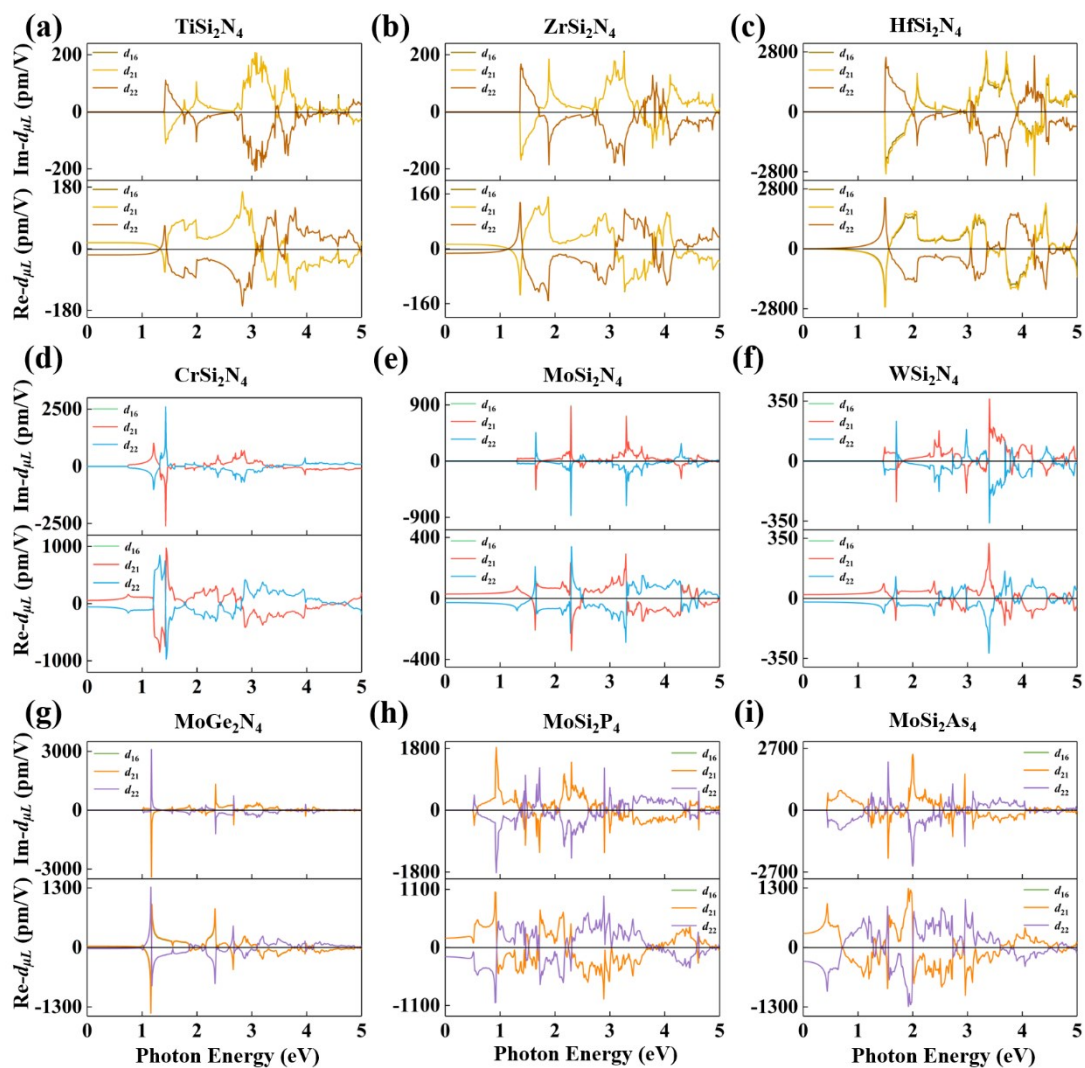

Figure S2. Photon energy-dependent imaginary and real components of second-order coefficients for  $MA_2Z_4$  family.

### S3 Polar plot of SHG intensity as a function of azimuthal angle and incident angle

Considering the sample shed by the linearly polarized pump light with an incident angle  $\theta$ , the electric field of the pump light can be given as follows:

$$\begin{bmatrix} E_x \\ E_y \\ E_z \end{bmatrix} = \begin{bmatrix} E_0 \cos[\theta] \\ 0 \\ E_0 \sin[\theta] \end{bmatrix} \quad \backslash * \text{ MERGEFORMAT (S1)}$$

The relationship between the second order nonlinear susceptibility  $\chi_{ijk}^{(2)}$  and the second-order nonlinear coefficient  $d_{\mu L}$  can be described as:

$$d_{\mu L} = \frac{1}{2} \chi_{ijk}^{(2)} = \begin{bmatrix} d_{11} & d_{12} & d_{13} & d_{14} & d_{15} & d_{16} \\ d_{21} & d_{22} & d_{23} & d_{24} & d_{25} & d_{26} \\ d_{31} & d_{32} & d_{33} & d_{34} & d_{35} & d_{36} \end{bmatrix} \backslash *$$

MERGEFORMAT (S2)

By the use of rotation operation  $T(\phi)$ , we can obtain the transformed tensor containing azimuthal angle:

$$d_{i,j,k}^{(2)'} = \sum_{f=1}^3 T_{i,f} \times \sum_{g=1}^3 T_{j,g} \times \sum_{h=1}^3 T_{k,h} \times d_{f,g,h}^{(2)} \quad \backslash *$$

MERGEFORMAT (S3)

$$T(\phi) = \begin{bmatrix} \cos[\phi] & \sin[\phi] & 0 \\ -\sin[\phi] & \cos[\phi] & 0 \\ 0 & 0 & 1 \end{bmatrix} \quad \backslash * \text{ MERGEFORMAT (S4)}$$

Here  $\phi$  is the azimuthal angle between the mirror plane in the crystal structure and the polarization of the pump beam.  $T_{i,f}, T_{j,g}, T_{k,h}$  is a component in  $T(\phi)$ . Thus the SHG elements can be expressed as:

$$\begin{bmatrix} P_x(2\omega) \\ P_y(2\omega) \\ P_z(2\omega) \end{bmatrix} = 2\varepsilon_0 d'_{\mu L}(\phi) \begin{bmatrix} E_x^2(\omega, \theta) \\ E_y^2(\omega, \theta) \\ E_z^2(\omega, \theta) \\ 2E_y(\omega, \theta)E_z(\omega, \theta) \\ 2E_z(\omega, \theta)E_x(\omega, \theta) \\ 2E_x(\omega, \theta)E_y(\omega, \theta) \end{bmatrix} \quad \backslash^* \text{ MERGEFORMAT}$$

(S5)

where  $\varepsilon_0$  represents the permittivity of the space.

With the calculated nonzero second-order nonlinear coefficients and their relationship, the SHG polarization components from MA<sub>2</sub>Z<sub>4</sub> can be expressed as:

$$P_{MA_2Z_4} = \begin{bmatrix} P_x \\ P_y \\ P_z \end{bmatrix} = 2\varepsilon_0 \begin{bmatrix} -d_{22}E_0^2 \cos^2[\theta] \sin[3\phi] \\ -d_{22}E_0^2 \cos^2[\theta] \cos[3\phi] \\ 0 \end{bmatrix} \quad \backslash^*$$

MERGEFORMAT (S6)

Thus, the two polarization components (parallel and perpendicular) of SHG intensity as a function of azimuthal and incident angle can be described as:

$$I_{//} \propto \left[ -P_x(d_{\mu L}, \phi) \cos[\theta] + P_z(d_{\mu L}, \phi) \sin[\theta] \right]^2 \quad \backslash^*$$

MERGEFORMAT (S7)

$$I_{\perp} \propto P_y^2(d_{\mu L}, \phi) \quad \backslash^* \text{ MERGEFORMAT (S8)}$$

Lastly, the  $I_{//}$  and  $I_{\perp}$  from MA<sub>2</sub>Z<sub>4</sub> can be expressed as:

$$I_{//} \propto d_{22}^2 \sin^2[3\phi] \cos^4[\theta] \quad \backslash^* \text{ MERGEFORMAT (S9)}$$

$$I_{\perp} \propto d_{22}^2 \cos^2[3\phi] \cos^4[\theta] \quad \backslash^* \text{ MERGEFORMAT (S10)}$$



## S4 Polar plots of SHG intensity from MA<sub>2</sub>Z<sub>4</sub> family under different incident photon energy

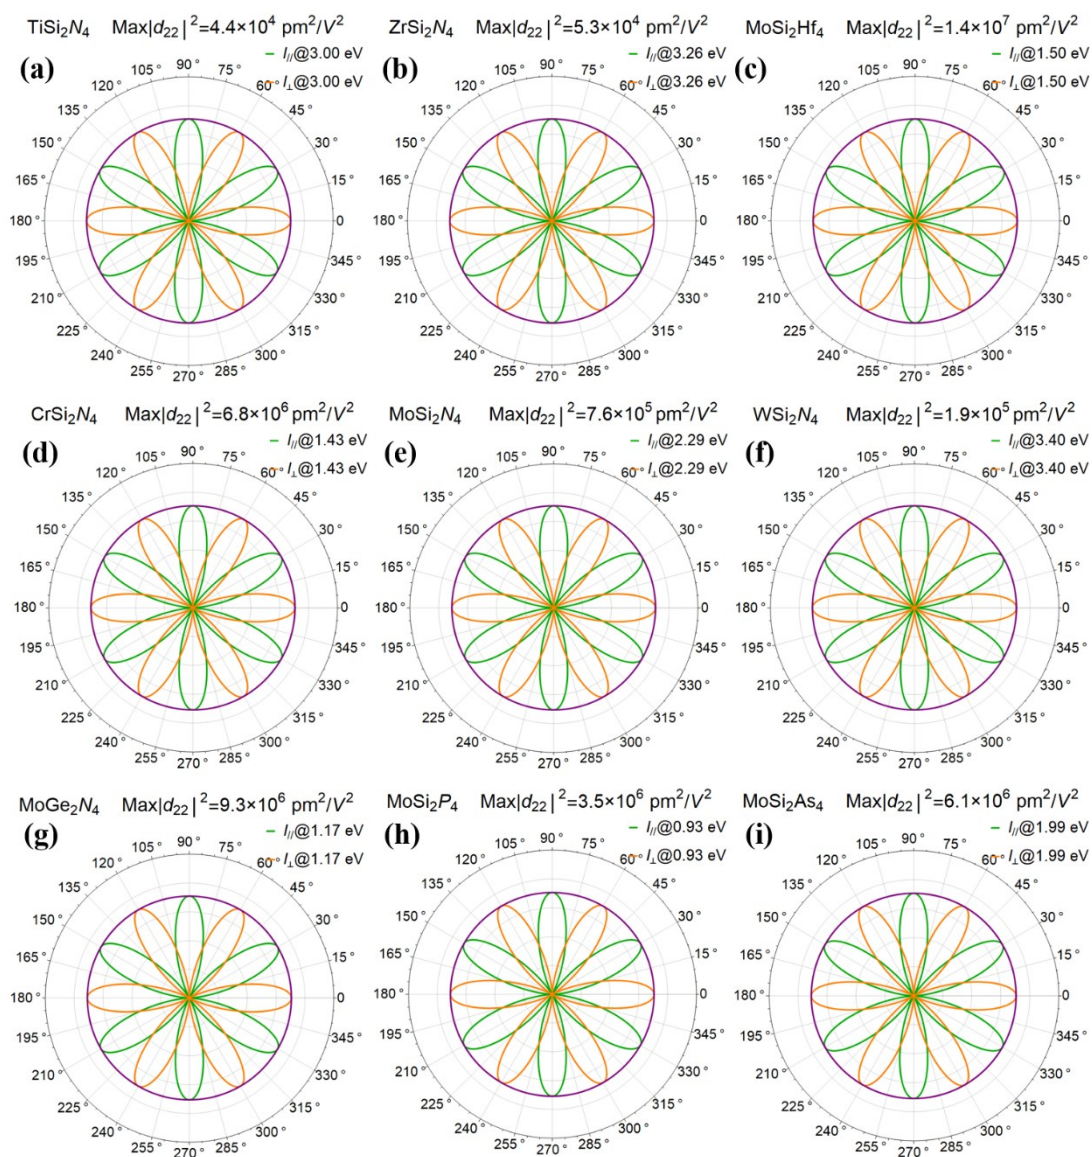

Figure S4. Polar plots of the SHG intensity from MA<sub>2</sub>Z<sub>4</sub> as a function of the crystal's azimuthal angle under different photon energy. Their maximum values are represented by the purple circles in the polar plot and listed on the top.

S5 All the locations of prominent peaks and their corresponding  $d_{22}$   
in  $MA_2Z_4$  family

| Compound                          | $d_{22}$<br>(pm/V)<br>@ $E_1$ | $d_{22}$<br>(pm/V)<br>@ $E_2$ | $d_{22}$<br>(pm/V)<br>@ $E_3$ | $d_{22}$<br>(pm/V)<br>@ $E_4$ | $d_{22}$<br>(pm/V)<br>@ $E_5$ | $d_{22}$<br>(pm/V)<br>@ $E_6$ | $d_{22}$<br>(pm/V)<br>@ $E_7$ |
|-----------------------------------|-------------------------------|-------------------------------|-------------------------------|-------------------------------|-------------------------------|-------------------------------|-------------------------------|
| TiSi <sub>2</sub> N <sub>4</sub>  | 116.26 @<br>1.43 eV           | 120.73@<br>1.99 eV            | 179.10 @<br>2.84 eV           | 210.75 @<br>3.00 eV           | 209.40 @<br>3.06 eV           | 195.28 @<br>3.17 eV           | 161.10 @<br>3.66 eV           |
| ZrSi <sub>2</sub> N <sub>4</sub>  | 201.71 @<br>1.37 eV           | 207.92 @<br>1.89 eV           | 147.19 @<br>2.95 eV           | 183.18 @<br>3.08 eV           | 229.84 @<br>3.26 eV           | 128.26 @<br>3.78 eV           | 137.93 @<br>4.10 eV           |
| HfSi <sub>2</sub> N <sub>4</sub>  | 3697.04 @<br>1.50 eV          | 1632.08 @<br>1.85 eV          | 1929.53 @<br>2.08 eV          | 2575.91 @<br>3.34 eV          | 2665.56 @<br>3.71 eV          | 2619.93 @<br>4.22 eV          | 2115.52 @<br>4.44 eV          |
| CrSi <sub>2</sub> N <sub>4</sub>  | 1012.17 @<br>1.21 eV          | 900.43 @<br>1.33 eV           | 2608.85<br>@ 1.43 eV          | 582.02 @<br>2.70 eV           | 747.84 @<br>2.86 eV           | 414.39 @<br>3.19 eV           | 382.10 @<br>3.97 eV           |
| MoSi <sub>2</sub> N <sub>4</sub>  | 471.62 @<br>1.65 eV           | 870.82 @<br>2.29 eV           | 737.41 @<br>3.30 eV           | 256.51 @<br>3.58 eV           | 281.23 @<br>4.30 eV           |                               |                               |
| WSi <sub>2</sub> N <sub>4</sub>   | 239.61 @<br>1.70 eV           | 147.50 @<br>2.40 eV           | 176.72 @<br>2.48 eV           | 184.53 @<br>2.98 eV           | 441.19 @<br>3.40 eV           | 199.41 @<br>3.68 eV           | 129.83 @<br>4.17 eV           |
| MoGe <sub>2</sub> N <sub>4</sub>  | 3042.65 @<br>1.17 eV          | 1294.50 @<br>2.34 eV          | 764.71 @<br>2.67 eV           |                               |                               |                               |                               |
| MoSi <sub>2</sub> P <sub>4</sub>  | 1874.79 @<br>0.93 eV          | 1085.45 @<br>1.46 eV          | 1295.03 @<br>1.72 eV          | 1129.80 @<br>2.16 eV          | 1403.39 @<br>2.30 eV          | 1345.30 @<br>2.90 eV          |                               |
| MoSi <sub>2</sub> As <sub>4</sub> | 1052.39 @<br>0.45 eV          | 2143.43 @<br>1.55 eV          | 2464.77 @<br>1.99 eV          | 1017.45 @<br>2.23 eV          | 1163.34 @<br>2.73 eV          | 1674.23 @<br>2.95 eV          | 969.74 @<br>3.10 eV           |

Table S1. All the locations of prominent peaks and their corresponding  $d_{22}$  in  $MA_2Z_4$  family.
